# Supplementary material for: Physiologically Based Biopharmaceutics Model (PBBM) of Minimally Absorbed Locally Acting Drugs in the Gastrointestinal Tract—Case Study: Tenapanor
Source: MDPI journal article supplement (doi:10.3390/pharmaceutics15122726), 2023-12-04
Supplement: s1 [file s1]

# Supplementary Material: Physiologically Based Biopharmaceutics Model (PBBM) of Minimally Absorbed Locally Acting Drugs in the Gastrointestinal Tract—Case Study: Tenapanor

Konstantinos Stamatopoulos, Nena Mistry, Nikoletta Fotaki, David B. Turner and Brandon Swift

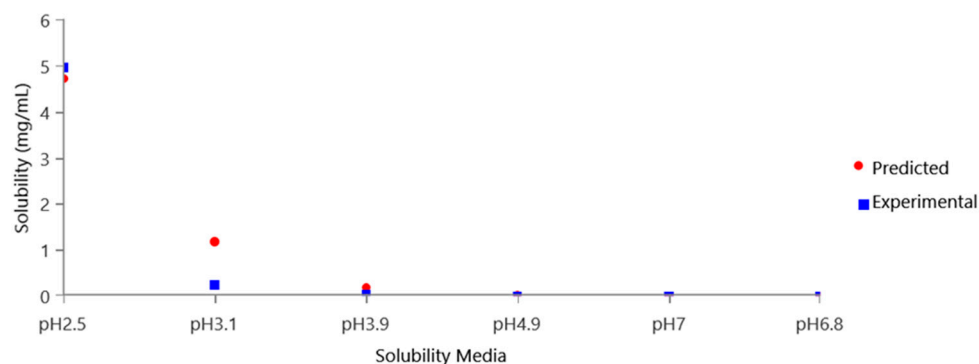

**Figure S1.** Model drug free form experimental vs. predicted aqueous solubility of tenapanor using SIVA v4.

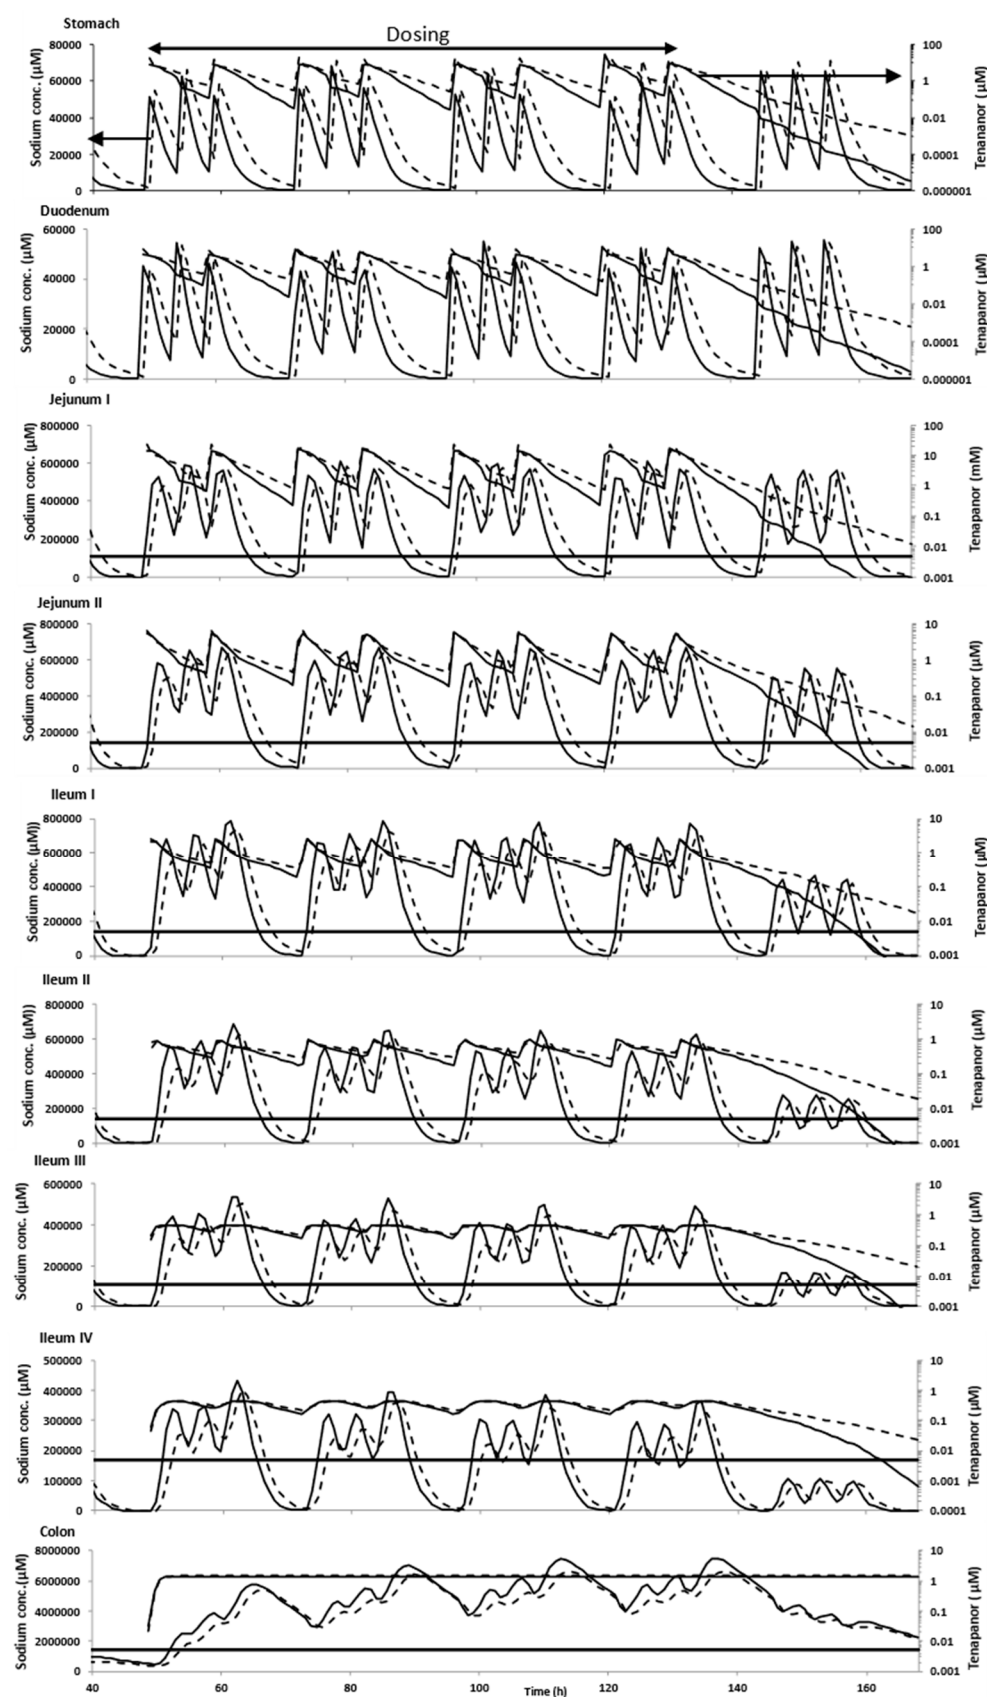

**Figure S2.** Predicted regional concentrations of sodium (linear scale) and tenapanor (log scale) using two scenarios; Gastric mean residence times of 1.35 h and tenapanor administration of 10 min before meal (—) and gastric mean residence times of 2.45 h and tenapanor administration of 60 min before

mean (---); the black solid horizontal line shows the target luminal concentration of tenapanor to reach  $IC_{50}$  (0.005  $\mu M$ ).
